# Supplementary material
Source: Springer Nature journal article supplement (https://www.springermedizin.de/resource/supplementary/12895_2009_102_MOESM3_ESM.pdf/9514106)

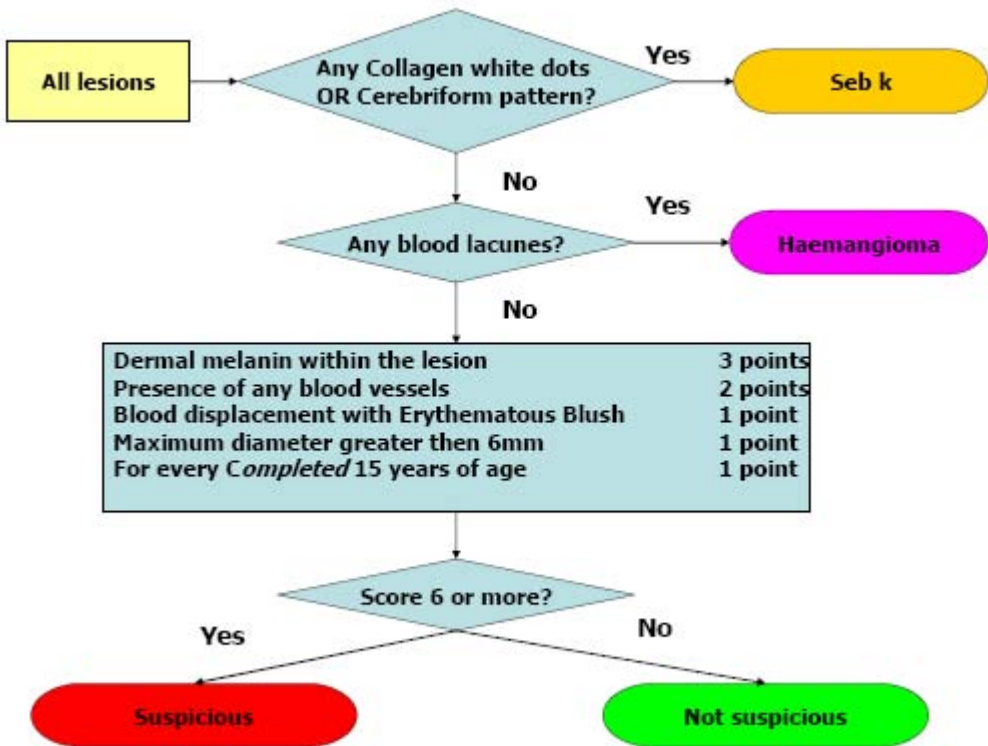

\*Seb k = Seborrhoeic keratosis

Supplement: MOESM3 [file 9514106]
